# Supplementary material for: Structure and assembly of the S-layer in C. difficile
Source: PubMed Central journal article supplement (PMC8881574; doi:10.1038/s41467-022-28196-w), 2022-02-25
Supplement: 41467_2022_28196_MOESM1_ESM.pdf [file 41467_2022_28196_MOESM1_ESM.pdf]

## SUPPLEMENTARY INFORMATION

### Structure and assembly of the S-layer in *C. difficile*

Paola Lanzoni-Mangutchi<sup>1\*</sup>, Oishik Banerji<sup>2\*\*#</sup>, Jason Wilson<sup>2\*</sup>, Anna Barwinska-Sendra<sup>1\*</sup>, Joseph A. Kirk<sup>2,3</sup>, Filipa Vaz<sup>4‡</sup>, Shauna O’Beirne<sup>2,3</sup>, Arnaud Baslé<sup>1</sup>, Kamel El Omari<sup>5</sup>, Armin Wagner<sup>5</sup>, Neil F. Fairweather<sup>6</sup>, Gillian R. Douce<sup>4</sup>, Per A. Bullough<sup>2§</sup>, Robert P. Fagan<sup>2,3§</sup>, Paula S. Salgado<sup>1§</sup>

<sup>1</sup> Biosciences Institute, Faculty of Medical Sciences, Newcastle University, Newcastle upon Tyne, UK

<sup>2</sup> Krebs Institute, School of Biosciences, University of Sheffield, Sheffield, UK

<sup>3</sup> Florey Institute, School of Biosciences, University of Sheffield, Sheffield, UK

<sup>4</sup> Institute of Infection, Immunity and Inflammation, College of Medical, Veterinary and Life Sciences, University of Glasgow, Glasgow, UK

<sup>5</sup> Diamond Light Source, Oxfordshire, UK

<sup>6</sup> Dept. Of Life Sciences, Imperial College London, London, UK

# Current address: Royal Society of Chemistry, Burlington House, Piccadilly, London, UK

‡ Current address: Department of Immunology, Oslo University Hospital, Oslo, Norway

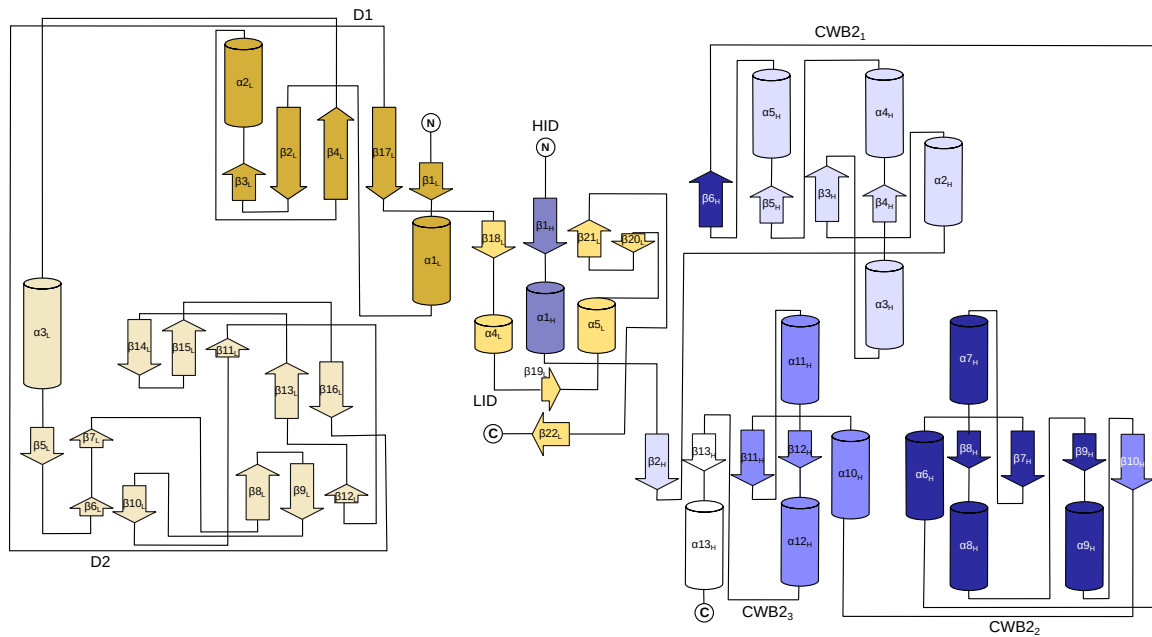

**Supplementary Fig. 1: H/L complex topology**

Topology of the mature SlpA<sub>CD630</sub> H/L complex, retrieved from structure analysis with PBDsum and Coot. SLP<sub>L</sub> represented in gold and SLP<sub>H</sub> coloured in blue. Colour shading represents different domains/motifs. Numbering of secondary structure components based on PDB ID 7ACY, subscripts indicate the relevant subunit. D1 – SLP<sub>L</sub> domain 1, D2 – SLP<sub>L</sub> domain 2, LID – SLP<sub>L</sub> interacting domain, HID – SLP<sub>H</sub> interacting domain, CWB2<sub>1</sub> – cell wall binding domain 1, CWB2<sub>2</sub> – cell wall binding domain 2, CWB2<sub>3</sub> – cell wall binding domain 3.

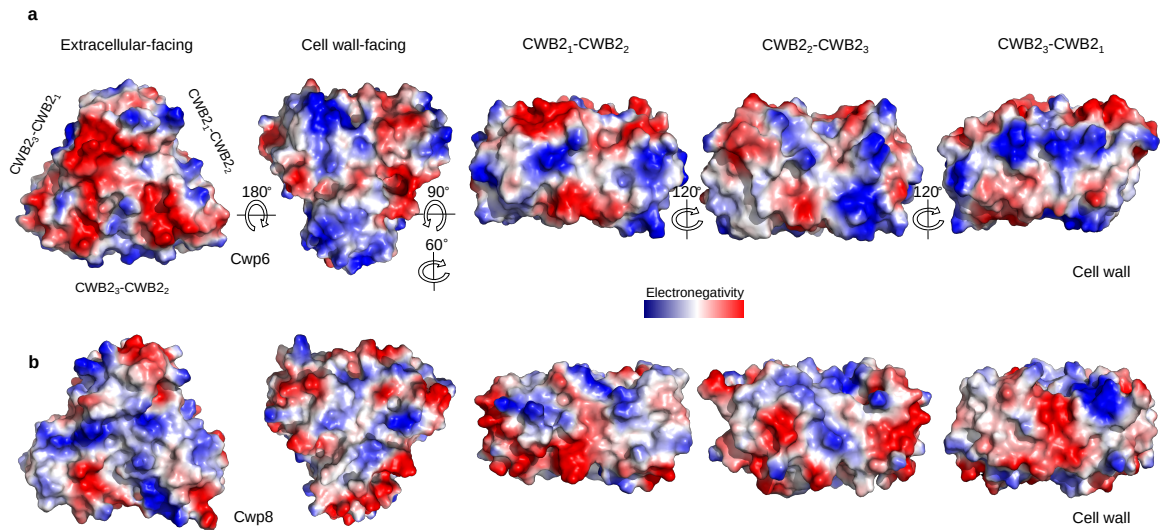

**Supplementary Fig. 2: Charge distribution across CWB2 motifs in CWP6 and CWP8, two minor components of the *C. difficile* S-layer**

Comparison of the Poisson-Boltzmann electrostatic potential calculated for CWB2 motifs from Cwp6 (a) and Cwp8 (b). The triangular CWB2 motifs of each CWP were superimposed onto the SlpA<sub>CD630</sub> CWB2s to determine orientation of Cwp6 and Cwp8. Views are shown from the extracellular and cell wall surfaces, followed by side views of the lateral faces defined by two interacting CWB2s, as per SlpA<sub>CD630</sub> H/L complex orientation at the cell surface. Electronegativity gradient: positive in blue to negative in red.

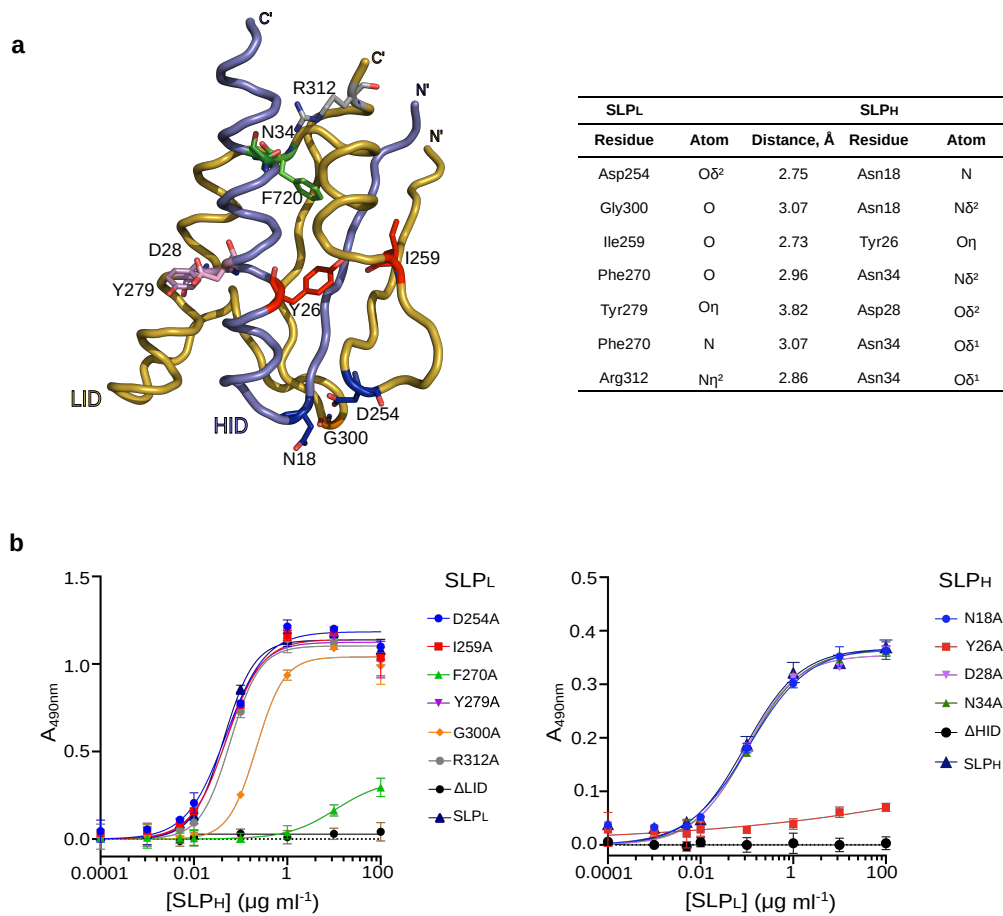

### Supplementary Fig. 3: Residues required for H/L complex

**a**, Key interactions identified at the interface of the LID/HID complex from strain R7404 (SLCT-7b) (left; identified with PDBePISA in PDB ID: 7ACW) informed site directed mutagenesis for functional assessment.

**b**, Effects of point substitution mutations in SLP<sub>L</sub> (left) or SLP<sub>H</sub> (right) on complex formation were tested by ELISA. Graphs represent mean ± SD of n = 3 experiments, with least squares curve fit. Source data provided in Source Data file.

SLCT7\_strain\_CD630

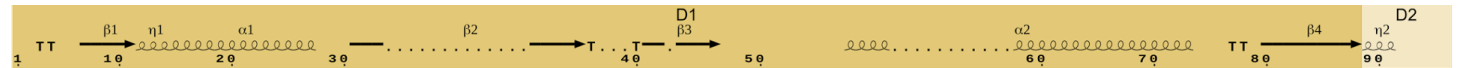

Multiple sequence alignment for SLCT7\_strain\_CD630 and other strains (SLCT11, SLCT7b, SLCT5, SLCT6, SLCT6/H2, SLCT1, SLCT2, SLCT4, SLCT8, SLCT10, SLCT3, SLCT12, SLCT9, SLCT13) across various domains.

SLCT7\_strain\_CD630

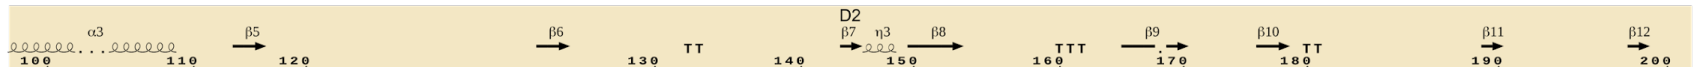

Multiple sequence alignment for SLCT7\_strain\_CD630 and other strains (SLCT7, SLCT5, SLCT6, SLCT6/H2, SLCT1, SLCT2, SLCT4, SLCT8, SLCT10, SLCT3, SLCT12, SLCT9, SLCT13) across various domains.

SLCT7\_strain\_CD630

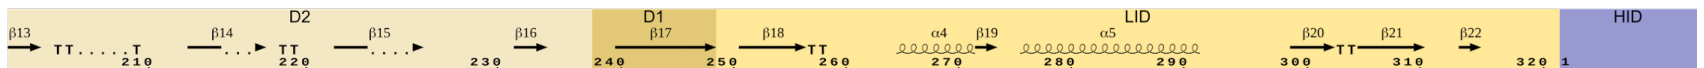

Multiple sequence alignment for SLCT7\_strain\_CD630 and other strains (SLCT11, SLCT7b, SLCT5, SLCT6, SLCT6/H2, SLCT1, SLCT2, SLCT4, SLCT8, SLCT10, SLCT3, SLCT12, SLCT9, SLCT13) across various domains.

SLCT7\_strain\_CD630

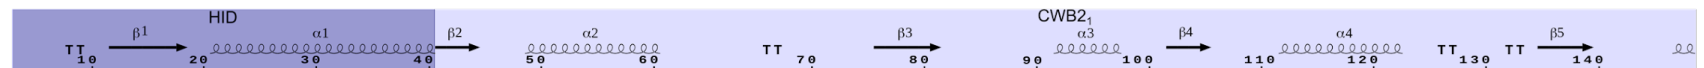

Multiple sequence alignment for SLCT7\_strain\_CD630 and other strains (SLCT7, SLCT11, SLCT7b, SLCT5, SLCT6, SLCT6/H2, SLCT1, SLCT2, SLCT4, SLCT8, SLCT10, SLCT3, SLCT12, SLCT9, SLCT13) across various domains.

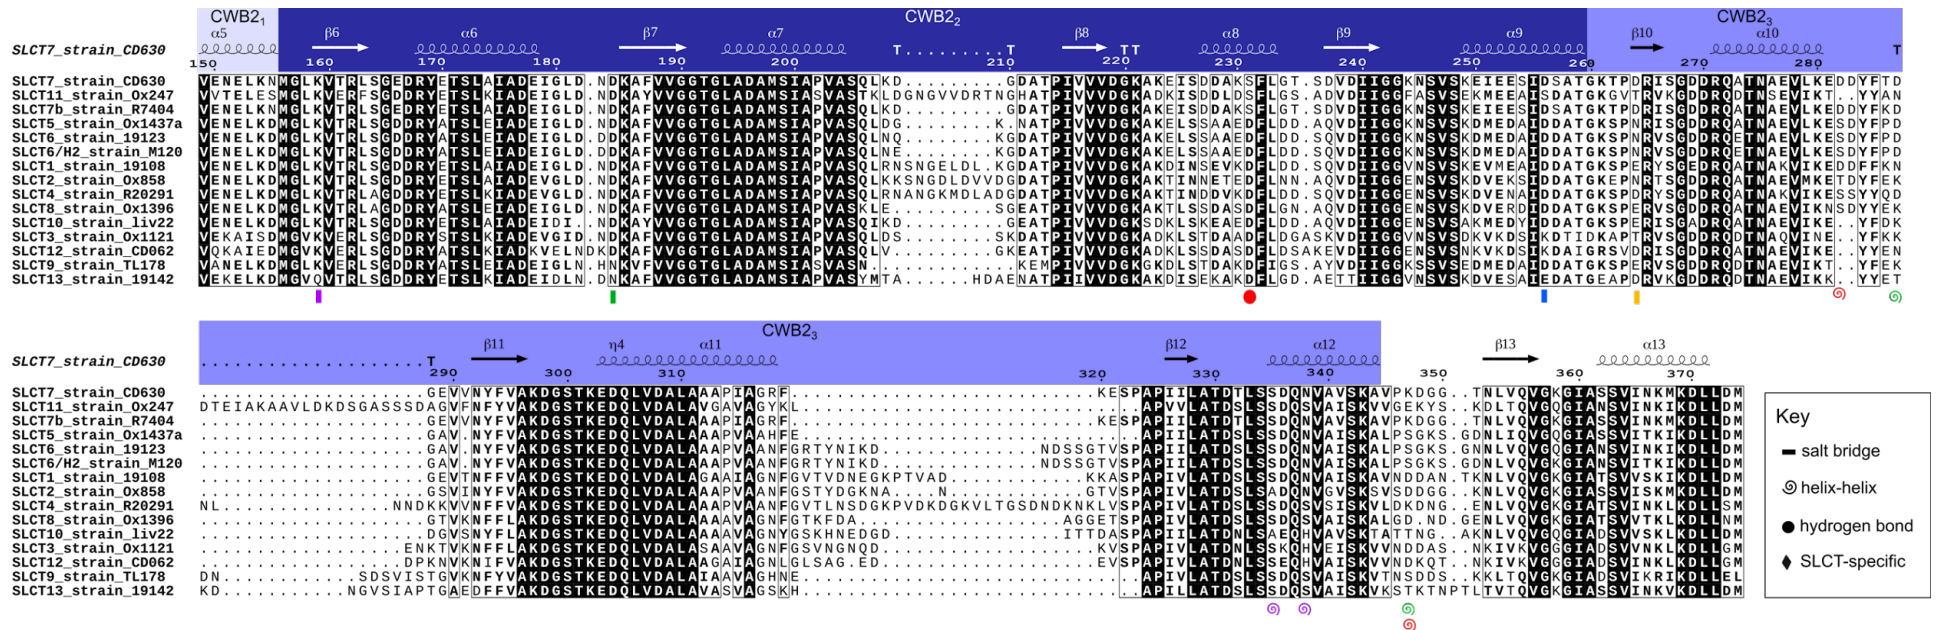

**Supplementary Fig. 4: Sequence alignment of representatives of each S-layer cassette type (SLCT)**

Secondary structural elements identified in the H/L CD630 complex (PDB ID: 7ACY) are indicated by looped lines –  $\alpha$ -helices and arrows –  $\beta$ -sheets. SLP<sub>L</sub> D1, D2 and LID domains and SLP<sub>H</sub> HID domain and CWB2 motifs are highlighted, coloured as in Fig. 1. Residues involved in interactions are marked as per key (see Supplementary Fig. 5 for details), with interacting residues marked with the same colour. Strictly conserved residues across all SLCTs are highlighted in black background, partially conserved groups are delimited by a box, with residues conserved within each group highlighted in bold, as per default in ESPrnt3 (<http://esprnt3.ibcp.fr>).

SLCT7 - strain CD630\*; SLCT1 - strain 1912; SLCT2 - strain Ox858; SLCT3 - Ox1121; SLCT4 - strain R20291\*; SLCT5 - Ox1437a; SLCT6 - strain 19123; SLCT6/H2 - strain M120; SLCT7b - R7404\*; SLCT8 - Ox1396; SLCT9 - strain TL178; SLCT10 - strain Liv22; SLCT11 - strain Ox247; SLCT12 - strain CD062; SLCT13 - strain 19142.

\*indicates strains with structural models included in this work.

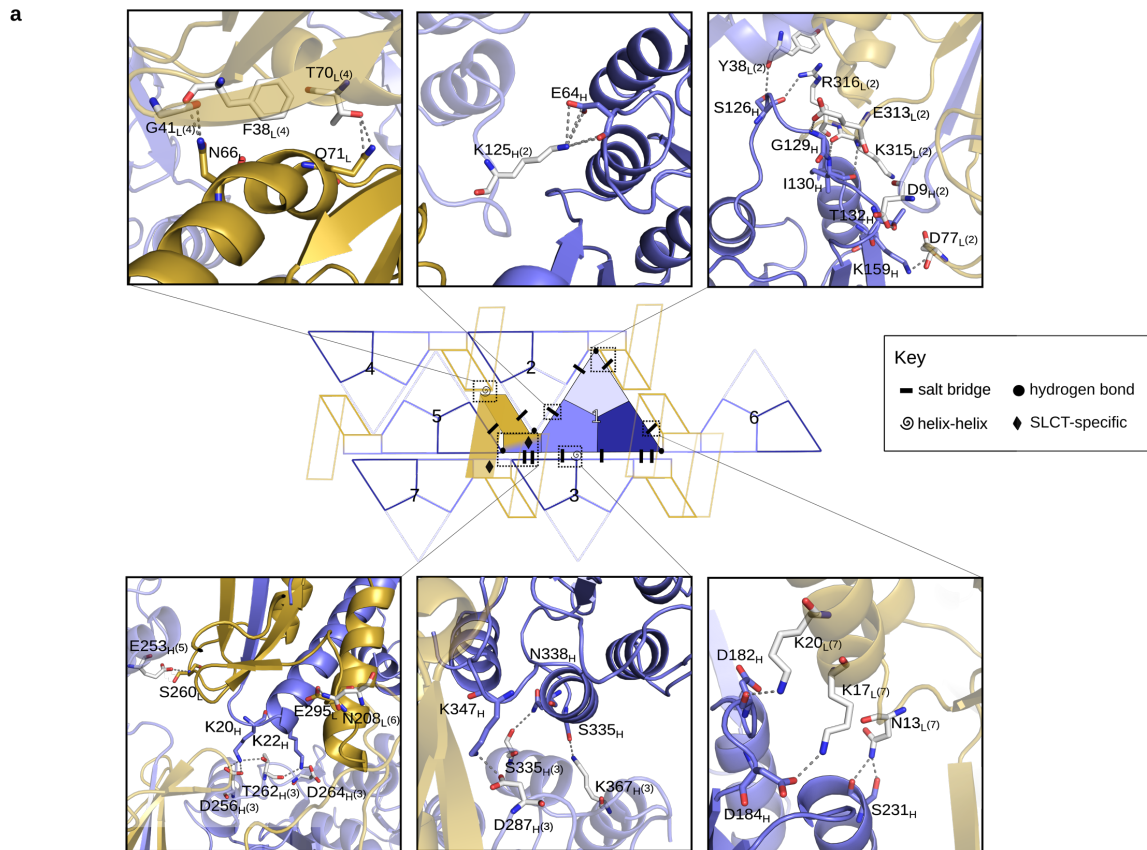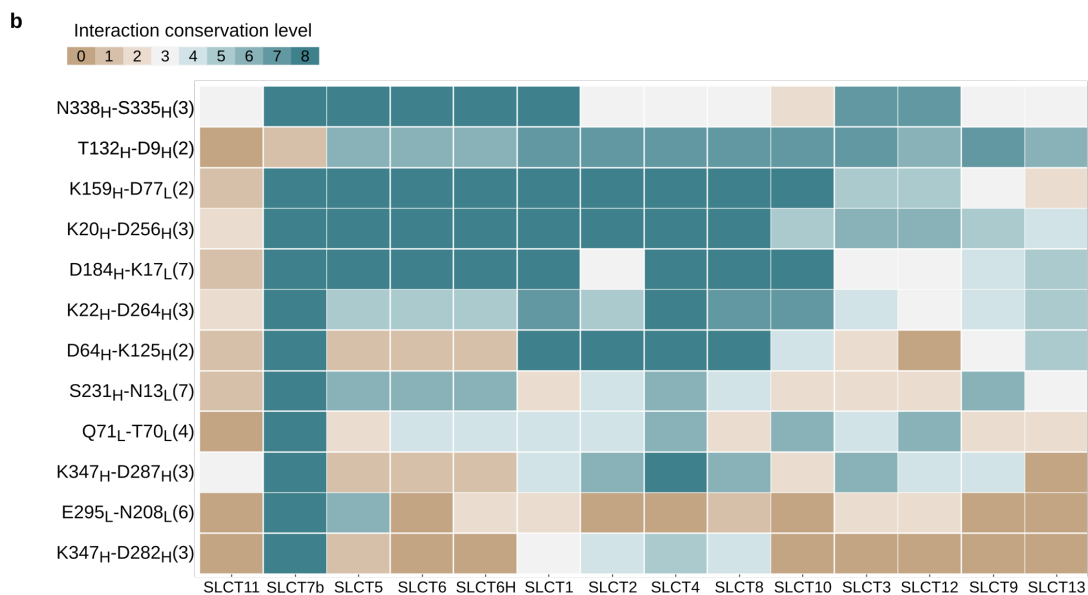

**Supplementary Fig. 5: Interactions between neighbouring molecules in S-layer packing**

**a**, Details of the interaction network between 7 SlpA<sub>CD630</sub> H/L complexes within the 2D array, with each molecule represented as cartoon, interacting residues as sticks (coloured as in schematic for molecule 1, white for neighbouring residues, with molecule number identifier



in parenthesis) and interactions as dashed lines. The interface depicted in each panel is marked by a corresponding box within the array representation

**b**, Clustermap of predicted conservation across known SLCTs for sidechain-sidechain interactions found in SlpA<sub>CD630</sub> H/L. Representatives of each SLCT were aligned (Supplementary Fig. 4), SWISS-MODEL structural homology models were generated and superimposed. The residues corresponding to interactions identified in SlpA<sub>CD630</sub> H/L were analyzed and interaction conservation compared to SLCT-7 was depicted based on residue conservation and prediction of similar or different type of possible interaction. Key: 0 – no residue conservation, unstructured region; 1 – one conserved residue, unstructured region; 2 – no residue conservation, no interaction; 3 – one conserved residue, no predicted interaction; 4 – no residue conservation, different interaction type; 5 – one conserved residue, different interaction type; 6 – no residue conservation, same interaction type; 7 – one conserved residue, same interaction type; 8 – residues and interaction conserved.

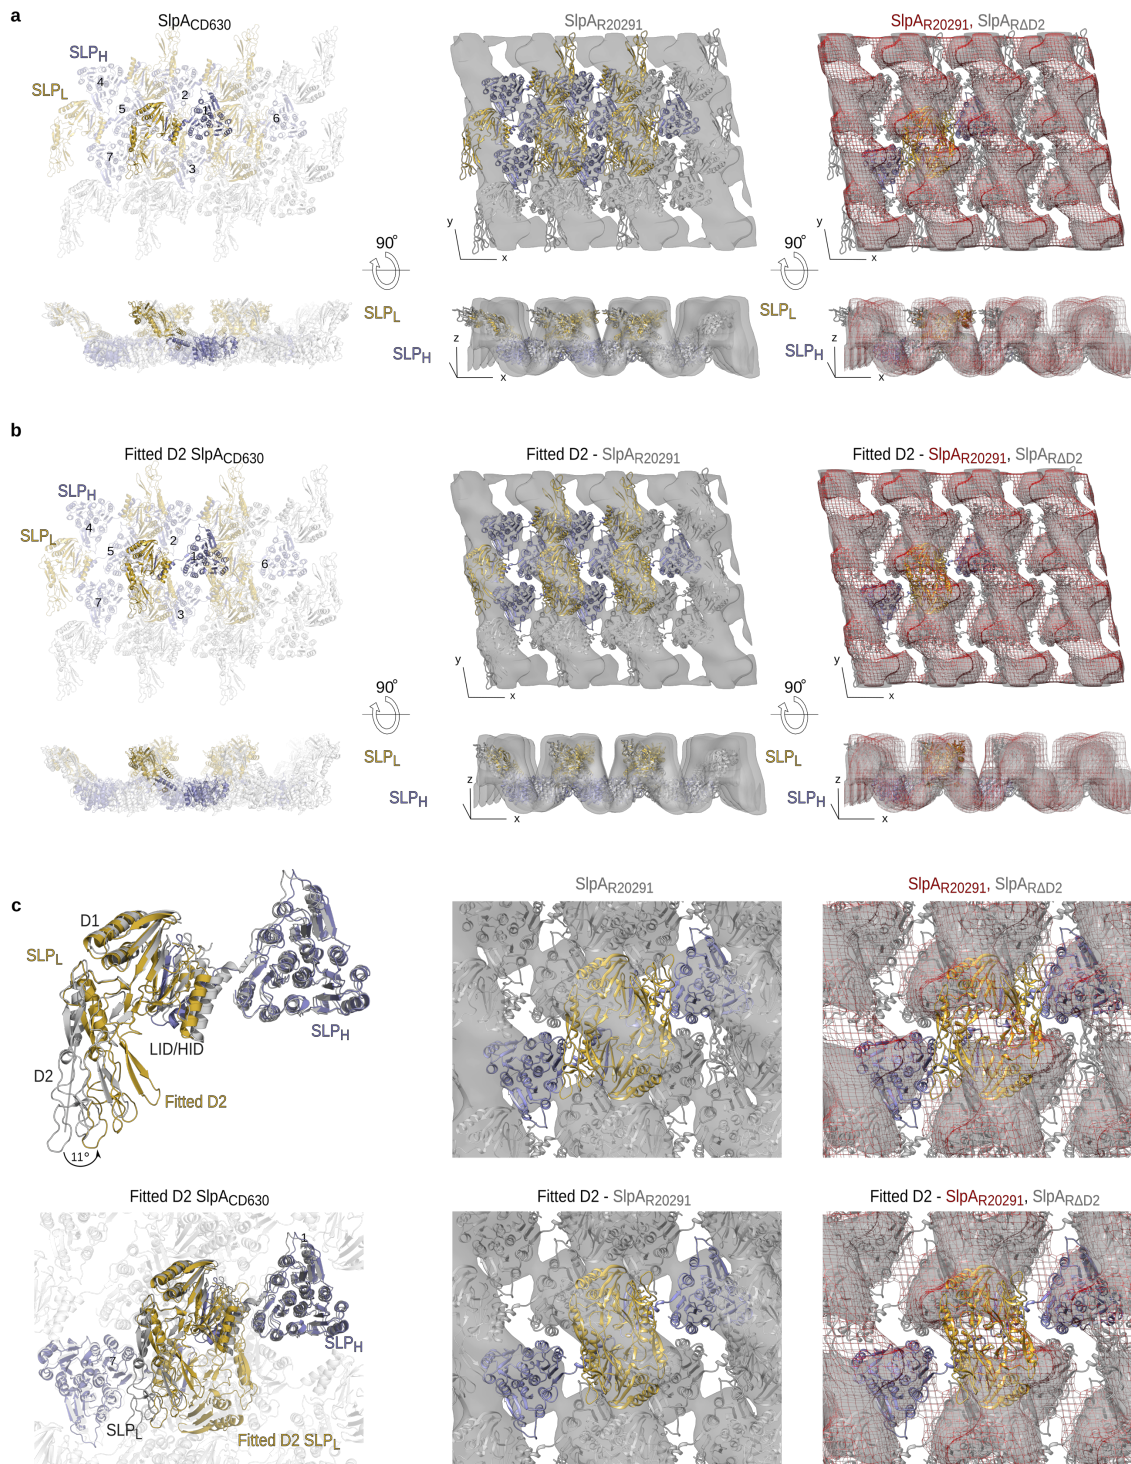

**Supplementary Fig. 6: Rotation of D2 domain allows optimised fit of H/L X-ray structure into the *in situ* packing of the native S-layer**

**a**, H/L planar crystallographic array (left, PDB ID 7ACY, cartoon representation, SLP<sub>L</sub> - gold, SLP<sub>H</sub> - slate blue, views as defined in Fig. 1b) fitting into the 3D reconstruction of negatively

stained S-layer ghost indicating the overall envelope in the native lattice (grey map, middle). Right panels show the native S-layer reconstruction as red chicken wire, overlaid on grey map for the 3D reconstruction from SlpA<sub>RΔD2</sub> ghosts after rigid body fitting of the X-ray models. Reconstructions and arrays are shown from the environment (top panels) and side views in the 2D plane (bottom panels).

**b**, Rotation of SLP<sub>L</sub> domain D2 by 11° towards the D1 domain allows for an improved fitting of H/L array into the native S-layer. The overall crystal packing is maintained (left, colours and views as in **a**) and a more compact SLP<sub>L</sub> fits the native lattice (middle panel), matching most of the density of the ridges, as seen in the side views (bottom panels). Comparison of the SlpA<sub>RΔD2</sub> (right, grey surface) and SlpA<sub>R20291</sub> (right, red chicken wire) reconstructions with the fitted D2 model further demonstrates that the missing density in the mutant S-layer reconstruction corresponds to the deleted D2 domain.

**c**, Superimposition of the crystallographic H/L complex (top left, grey) and the fitted (top left, coloured as in **a** and **b**) models shows a similar overall fold of the complex, with negligible reorientation in SLP<sub>H</sub>, D1 and LID/HID (RMSD between original and fitted subdomains is <1Å, see Methods for details) but a significant rotation of D2 towards D1 by 11°.

Zoomed views of the structural models with original (top) and reoriented D2 domains (bottom) fitted into SlpA<sub>R20291</sub> (middle panels) and SlpA<sub>RΔD2</sub> (left panels) S-layer ghosts, as presented in **a** and **b** illustrate how a more compact packing is possible.

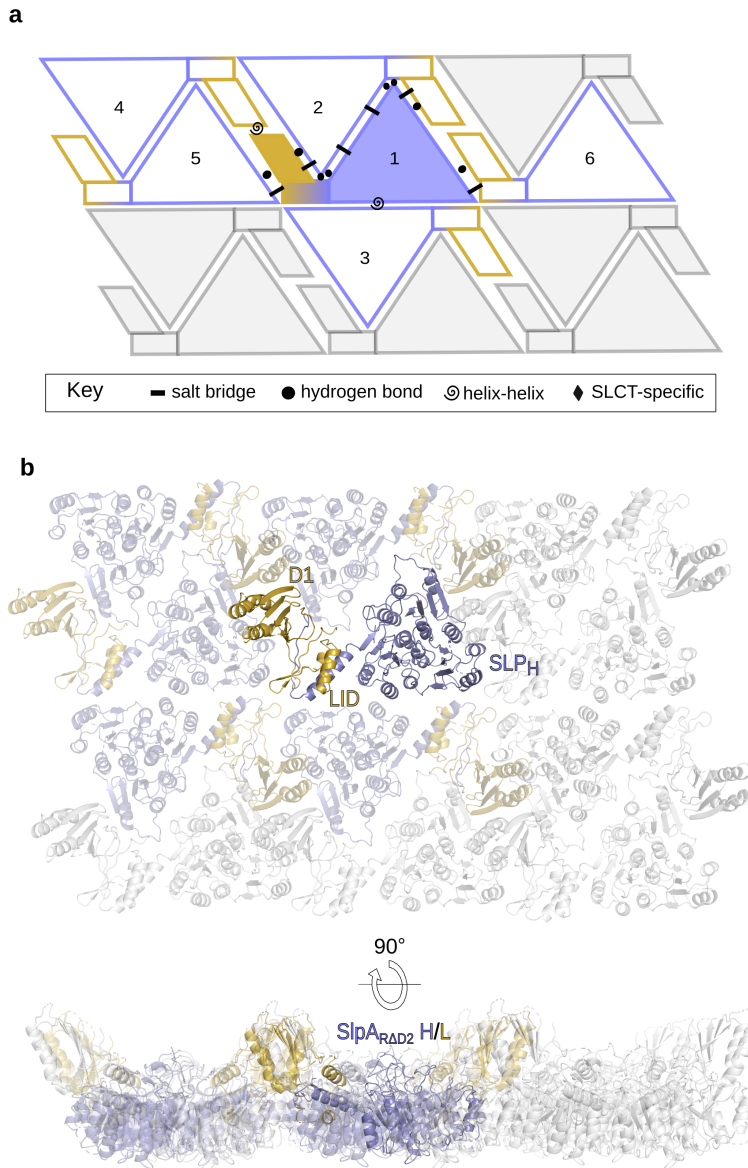

**Supplementary Fig. 7: Absence of D2 does not affect overall structure and packing**

**a**, 2D tiling representation of SlpA<sub>RAD2</sub> assembly in crystal packing (PDB ID: 7ACZ), with identified interactions represented as symbols defined in the key (as in Fig. 3).

**b**, Cartoon representation of the SlpA<sub>RAD2</sub> array (SLP<sub>L</sub> coloured in gold and SLP<sub>H</sub> in slate blue) in top and a side view (as defined in Fig. 3).



**b**, Superimposition of the reconstruction of negatively stained native S-layer (grey surface) on the projection in **a**.

**c**, Projection map at 8.7 Å resolution of frozen hydrated *C. difficile* S-layer ghost containing SlpA<sub>RΔD2</sub>, depicted as in **a**.

**d**, Wild type minus SlpA<sub>RΔD2</sub> difference projection map. Positive difference density corresponds to the projection of the ridge-like density in the 3D reconstruction shown in **b**.

**e**, Superposition of isolated domain D2 crystal structure (gold surface) on the difference projection map in **d**. Pseudo-symmetrically related structures are shown together in the central density.

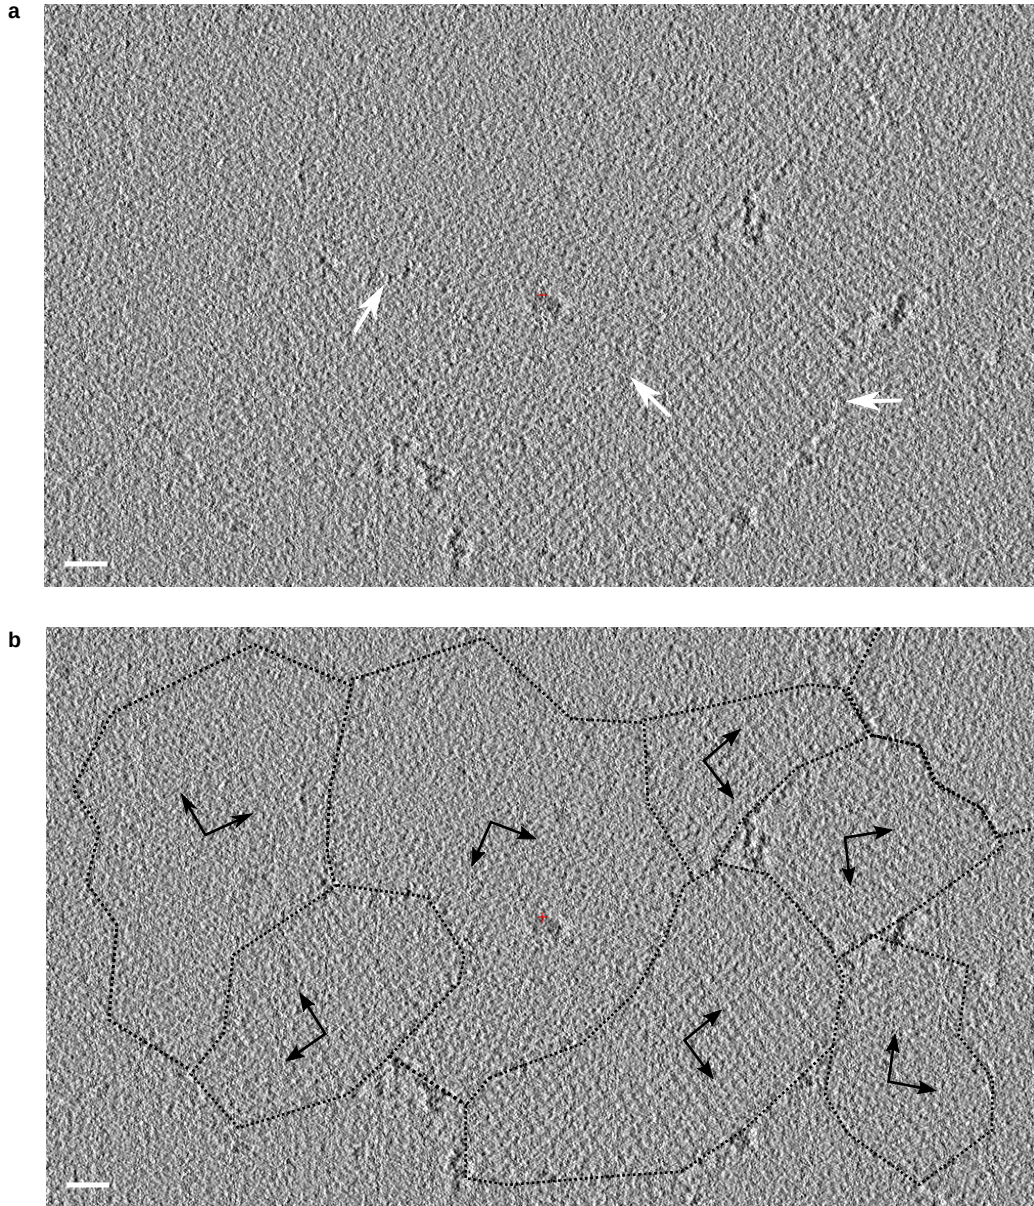

**Supplementary Fig. 9: Patches of S-layer present in cryo-electron tomographic slice of extracted S-layer ghosts**

**a,** Distinct S-layer lattice patches can be seen in tomographic slices of S-layer ghosts, with 'fault lines' present where patches intersect (white arrows). Tomogram representative of 52 tomograms collected.

**b,** Annotated patches from **a** (dotted lines) have distinct orientations on the surface, with unit cell axes of the different lattices highlighted (black arrows). Scale bar: 25 nm.

**Supplementary Table 1 - Data collection and refinement statistics**

|                                | LID/HID                    | SLP <sub>L</sub> /HID     | H/L R7404<br>S-SAD        | H/L R7404 <sup>1</sup>    | H/L CD630                 | H/L RΔD2                  |
|--------------------------------|----------------------------|---------------------------|---------------------------|---------------------------|---------------------------|---------------------------|
| <b>Data collection</b>         |                            |                           |                           |                           |                           |                           |
| Space group                    | C2                         | C2                        | P2 <sub>1</sub>           | P2 <sub>1</sub>           | P1                        | P1                        |
| Cell dimensions                |                            |                           |                           |                           |                           |                           |
| $a, b, c$ (Å)                  | 73.3, 56.7,<br>61.8        | 172.9,<br>29.5, 144.3     | 76.7,<br>134.7, 83.9      | 78.1,<br>137.9, 84.7      | 72.7, 78.3,<br>81.6       | 52.8, 80.4,<br>81.9       |
| $\alpha, \beta, \gamma$ (°)    | 90.0,<br>122.7, 90.0       | 90.0, 94.2,<br>90.0       | 90.0,<br>100.8, 90.0      | 90.0,<br>100.7, 90.0      | 81.9, 67.0,<br>65.3       | 97.0, 90.2,<br>90.2       |
| Wavelength (Å)                 | 0.975                      | 0.969                     | 2.755                     | 0.928                     | 0.969                     | 0.969                     |
| Resolution (Å)                 | 41.74- 1.50<br>(1.55-1.50) | 53.35-2.40<br>(2.49-2.40) | 47.70-3.00<br>(3.16-3.00) | 83.26-2.65<br>(2.75-2.65) | 52.31-2.55<br>(2.64-2.55) | 44.34-3.50<br>(3.63-3.50) |
| I/ $\sigma$                    | 8.1 (2.3)                  | 5.8 (2.1)                 | 16.5 (1.2)                | 12.1 (1.4)                | 7.0 (1.5)                 | 10.0 (2.5)                |
| CC1/2                          | 0.998<br>(0.975)           | 0.992<br>(0.731)          | 0.998<br>(0.707)          | 0.712<br>(0.360)          | 0.992<br>(0.732)          | 0.627<br>(0.438)          |
| Completeness (%)               | 99 (97)                    | 100 (100)                 | 91 (80)                   | 100 (100)                 | 96 (97)                   | 99 (97)                   |
| Redundancy                     | 3.4 (2.6)                  | 1.9 (1.9)                 | 6.4 (6.1)                 | 48.0 (43.0)               | 3.3 (3.4)                 | 3.4 (3.5)                 |
| Anomalous completeness         |                            |                           | 91.2 (79.7)               |                           |                           |                           |
| Anomalous multiplicity         |                            |                           | 3.3 (3.3)                 |                           |                           |                           |
| <b>Refinement</b>              |                            |                           |                           |                           |                           |                           |
| Resolution (Å)                 | 41.74- 1.50                | 53.35-2.40                |                           | 83.26-2.65                | 52.31-2.55                | 44.34-3.50                |
| No. reflections                | 33987                      | 29329                     |                           | 51027                     | 47200                     | 16606                     |
| $R_{work} / R_{free}$          | 18.1/21.0                  | 25.3/29.9                 |                           | 22.6/27.8                 | 24.3/26.5                 | 25.5/27.6                 |
| No. atoms                      |                            |                           |                           |                           |                           |                           |
| Protein                        | 1709                       | 3477                      |                           | 9945                      | 10306                     | 7890                      |
| Ligand/ion                     | -                          | -                         |                           | 40                        | 15                        | -                         |
| Water                          | 107                        | 166                       |                           | 111                       | 97                        | -                         |
| $B$ -factors (Å <sup>2</sup> ) |                            |                           |                           |                           |                           |                           |
| Protein                        | 33.1                       | 37.4                      |                           | 71.9                      | 60.2                      | 37.0                      |
| Ligand/ion                     | -                          | -                         |                           | 71.8                      | 123.3                     | -                         |
| Water                          | 37.6                       | 33.1                      |                           | 59.4                      | 46.0                      | -                         |
| Ramachandran %                 |                            |                           |                           |                           |                           |                           |
| favoured                       | 100.0                      | 98.4                      |                           | 97.2                      | 98.5                      | 96.1                      |
| allowed                        | 0.0                        | 1.6                       |                           | 2.6                       | 1.5                       | 3.8                       |
| outliers                       | 0.0                        | 0.00                      |                           | 0.2                       | 0.00                      | 0.1                       |
| R.m.s. deviations              |                            |                           |                           |                           |                           |                           |
| Bond lengths (Å)               | 0.009                      | 0.003                     |                           | 0.007                     | 0.006                     | 0.003                     |
| Bond angles (°)                | 1.14                       | 0.58                      |                           | 1.19                      | 1.01                      | 0.60                      |
| PDB ID                         | 7ACW                       | 7ACV                      |                           | 7ACX                      | 7ACY                      | 7ACZ                      |

\*Values in parentheses are for highest-resolution shell.

<sup>1</sup>Two crystals were used to determine the structure of H/L complex R7404.



**Supplementary Table 2 - EM data and reconstruction statistics**

|                                                                                                  | SlpA <sub>R20291</sub> | SlpA <sub>RΔD2</sub> |
|--------------------------------------------------------------------------------------------------|------------------------|----------------------|
| <b>3D merging statistics<br/>(EM reconstructions;<br/>negative staining)</b>                     |                        |                      |
| Resolution limit (Å)                                                                             | 20                     | 20                   |
| No. structure factors                                                                            | 1085                   | 667                  |
| Overall R-factor                                                                                 | 0.33                   | 0.33                 |
| Overall phase residual (°)                                                                       | 22.3                   | 13.9                 |
| <b>Phase residuals in CryoEM<br/>projections<br/>(<math>\rho</math>2-averaged Fourier terms)</b> |                        |                      |
| No. independent phases                                                                           |                        |                      |
| Resolution shell (Å)                                                                             |                        |                      |
| ∞ – 15                                                                                           | 43                     | 43                   |
| 15 - 11                                                                                          | 42                     | 42                   |
| 11 - 8.7                                                                                         | 47                     | 45                   |
| 8.7 – 7.5                                                                                        | 44                     | -                    |
| Mean value phase error*                                                                          |                        |                      |
| Resolution shell (Å)                                                                             |                        |                      |
| ∞ – 15                                                                                           | 15.3                   | 21.5                 |
| 15 - 11                                                                                          | 22.9                   | 28.7                 |
| 11 - 8.7                                                                                         | 32.2                   | 33.8                 |
| 8.7 – 7.5                                                                                        | 36.8                   | -                    |
| Standard error (°)                                                                               |                        |                      |
| Resolution shell (Å)                                                                             |                        |                      |
| ∞ – 15                                                                                           | 2.4                    | 3.5                  |
| 15 - 11                                                                                          | 2.8                    | 4.1                  |
| 11 - 8.7                                                                                         | 3.6                    | 3.6                  |
| 8.7 – 7.5                                                                                        | 3.9                    | -                    |

\*Mean value phase error against symmetry-imposed phase of 0° or 180° (45° is expected for random phases<sup>1</sup>).

**Supplementary Table 3 – Symmetry table for cryo-EM reconstruction of SlpA<sub>R20291</sub>**

| Plane Group <sup>†</sup> | Phase residual (°)<br>(random = 90°) | Target residual <sup>‡</sup> (°) |
|--------------------------|--------------------------------------|----------------------------------|
| p1                       | 27.0                                 | -                                |
| p2*                      | 37.5                                 | 39.7                             |
| p12b                     | 77.6                                 | 29.8                             |
| p12a                     | 55.1                                 | 29.8                             |
| p121b                    | 57.2                                 | 29.8                             |
| p121a                    | 51.0                                 | 29.8                             |
| c12b                     | 77.6                                 | 29.8                             |
| c12a                     | 55.1                                 | 29.8                             |
| p222                     | 67.7                                 | 33.6                             |
| p2221b                   | 52.7                                 | 33.6                             |
| p2221a                   | 47.5                                 | 33.6                             |
| p2221a                   | 62.2                                 | 33.6                             |
| c222                     | 67.7                                 | 33.6                             |
| p4                       | 46.8                                 | 33.6                             |
| p422                     | 61.9                                 | 30.1                             |
| p4212                    | 63.5                                 | 30.1                             |
| p3                       | 52.5                                 | 27.0                             |
| p312                     | 60.4                                 | 27.7                             |
| p321                     | 63.0                                 | 28.5                             |
| p6                       | 50.4                                 | 31.6                             |
| p622                     | 58.1                                 | 29.3                             |

\*Represents most likely plane group

<sup>†</sup>a and b represent the respective symmetry axis for the plane group

<sup>‡</sup>Target residual indicates the expected phase residual of each symmetry group based on the signal-to-noise ratio of the respective reflections<sup>2</sup>.

**Supplementary Table 4. Bacterial strains and plasmids used in x-ray crystallography and protein-protein interaction studies.**

| Strain or plasmid                                            | Description                                                                                                              | Reference/ Source Application                                |
|--------------------------------------------------------------|--------------------------------------------------------------------------------------------------------------------------|--------------------------------------------------------------|
| <b><i>C. difficile</i> strains</b>                           |                                                                                                                          |                                                              |
| CD630                                                        | Ribotype 012, SLCT-7                                                                                                     | 3                                                            |
| R20291                                                       | Ribotype 027, SLCT-4                                                                                                     | 4                                                            |
| FM2.5                                                        | R20291 <i>slpA</i> 282_283insA                                                                                           | 5                                                            |
| RΔD2                                                         | FM2.5 <i>slpA</i> ΔD2                                                                                                    | This study                                                   |
| R7404                                                        | Ribotype 017, SLCT-7b                                                                                                    | 6                                                            |
| <b><i>E. coli</i> strains</b>                                |                                                                                                                          |                                                              |
| NEB5a                                                        | <i>fhuA2 Δ(argF-lacZ)U169 phoA glnV44 Φ80 Δ(lacZ)M15 gyrA96 recA1 relA1 endA1 thi-1 hsdR17</i>                           | New England Biolabs                                          |
| BL21 (DE3)                                                   | <i>E. coli</i> str. B F- <i>ompT gal dcm lon hsdSB(rB-mB-) λ(DE3 [lacI lacUV5-T7p07 ind1 sam7 nin5]) [malB+]K-12(λS)</i> | Novagen                                                      |
| Rosetta (DE3)                                                | F- <i>ompT hsdSB(rB- mB-) gal dcm</i> (DE3) pRARE (CamR)                                                                 | Novagen                                                      |
| <b>Plasmids</b>                                              |                                                                                                                          |                                                              |
| pOB001                                                       | pMTL960-Ptet- <i>slpA</i> ΔD2 (R20291)                                                                                   | This study.<br>RF102/ RF103                                  |
| pRPF170                                                      | pMTL960-Ptet- <i>slpA</i> (CD630)                                                                                        | This study.<br>NF1414/ NF1415                                |
| pRPF233                                                      | pMTL960-Ptet- <i>slpA</i> (R20291)                                                                                       | 5                                                            |
| <b>Plasmids for recombinant expression of mature protein</b> |                                                                                                                          |                                                              |
| pABS17                                                       | pET28a-SLP <sub>L</sub> -6xHis-tag (R20291)                                                                              | This study.<br>SLP <sub>L</sub> of R20291;<br>oABS46/ oABS47 |
| pABS18                                                       | pET28a-SLP <sub>H</sub> -6xHis-tag (R20291)                                                                              | This study. SLP <sub>H</sub> of R20291;<br>oABS44/ oABS45    |
| pABS19                                                       | pET28a-SLP <sub>L</sub> -6xHis-tag (R7404)                                                                               | This study. SLP <sub>L</sub> of R7404;<br>oABS1/ oABS2       |

|                                                                                                                                 |                                                   |                                                                                                                                |
|---------------------------------------------------------------------------------------------------------------------------------|---------------------------------------------------|--------------------------------------------------------------------------------------------------------------------------------|
| pABS20                                                                                                                          | pET28a-SLP <sub>H</sub> -6xHis-tag (R7404)        | This study. SLP <sub>H</sub> of R7404; <i>NcoI/XhoI</i> subcloning from pJAK148 into pET28a                                    |
| pABS21                                                                                                                          | pET28a-SLP <sub>L</sub> ΔLID-6xHis-tag (R20291)   | This study. SLP <sub>L</sub> of R20291 lacking LID; oABS31/oABS48                                                              |
| pABS22                                                                                                                          | pET28a-SLP <sub>H</sub> ΔHID-6xHis-tag (R20291)   | This study. SLP <sub>H</sub> of R20291 lacking HID; oABS15/oABS16                                                              |
| pABS23                                                                                                                          | pET28a-SLP <sub>L</sub> ΔLID-6xHis-tag (R7404)    | This study. SLP <sub>L</sub> of R7404 lacking LID; oABS31/oABS32                                                               |
| pABS24                                                                                                                          | pET28a-SLP <sub>H</sub> ΔHID-6xHis-tag (R7404)    | This study. SLP <sub>H</sub> of R7404 lacking HID; oABS39/oABS16                                                               |
| pSLPH630                                                                                                                        | pET28a-SLP <sub>H</sub> -6xHis-tag (CD630)        | SLP <sub>H</sub> of CD630                                                                                                      |
| pSLPHΔ1-40                                                                                                                      | pET28a-SLP <sub>H</sub> ΔHID-6xHis-tag (CD630)    | <sup>7</sup> SLP <sub>H</sub> of CD630 lacking the N-terminal HID                                                              |
| pSLPL630                                                                                                                        | pET28a-SLP <sub>L</sub> -6xHis-tag (CD630)        | <sup>7</sup> SLP <sub>L</sub> of CD630                                                                                         |
| pSLPLΔ260-321                                                                                                                   | pET28a-SLP <sub>L</sub> ΔLID-6xHis-tag (CD630)    | <sup>7</sup> SLP <sub>L</sub> of CD630 lacking the C-terminal LID                                                              |
| pJAK149                                                                                                                         | pETDuet-1-HID-6xHis-tag –SLP <sub>L</sub> (R7404) | This study. Recombinant co-expression of mature SLP <sub>L</sub> /HID of R7404; RF1396/ RF1397, RF1398/ RF1400, RF1394/ RF1395 |
| pJAK147                                                                                                                         | pETDuet-1-HID-6xHis-tag – LID (R7404)             | This study. Recombinant co-expression of mature LID/HID of R7404; RF1396/ RF1397, RF1398/ RF1400, RF1395/ RF1396               |
| <b>Plasmids for expression of the mature protein with a point mutation in the interaction domain, as specified in subscript</b> |                                                   |                                                                                                                                |
| pABS1                                                                                                                           | pET28a-SLP <sub>L</sub> F274A-6xHis-tag (CD630)   | This study. oABS33/ oABS34                                                                                                     |
| pABS2                                                                                                                           | pET28a-SLP <sub>H</sub> Y27A-6xHis-tag (R20291)   | This study. oABS37/ oABS38                                                                                                     |
| pABS3                                                                                                                           | pET28a-SLP <sub>L</sub> F273A-6xHis-tag (R20291)  | This study. oABS35/ oABS36                                                                                                     |
| pABS4                                                                                                                           | pET28a-SLP <sub>H</sub> Y26A-6xHis-tag (R7404)    | This study. oABS5/ oABS6                                                                                                       |

|            |                                                         |                            |
|------------|---------------------------------------------------------|----------------------------|
| pABS5      | pET28a-SLP <sub>L F270A</sub> -6xHis-tag (R7404)        | This study. oABS21/ oABS22 |
| pABS6      | pET28a-SLP <sub>H N18A</sub> -6xHis-tag (R7404)         | This study. oABS3/ oABS4   |
| pABS7      | pET28a-SLP <sub>H D28A</sub> -6xHis-tag (R7404)         | This study. oABS7/ oABS8   |
| pABS9      | pET28a-SLP <sub>H N34A</sub> -6xHis-tag (R7404)         | This study. oABS11/ oABS12 |
| pABS11     | pET28a-SLP <sub>L D254A</sub> -6xHis-tag (R7404)        | This study. oABS17/ oABS18 |
| pABS12     | pET28a-SLP <sub>L I259A</sub> -6xHis-tag (R7404)        | This study. oABS19/ oABS20 |
| pABS13     | pET28a-SLP <sub>L Y279A</sub> -6xHis-tag (R7404)        | This study. oABS23/ oABS24 |
| pABS14     | pET28a-SLP <sub>L G300A</sub> -6xHis-tag (R7404)        | This study. oABS25/ oABS26 |
| pABS16     | pET28a-SLP <sub>L R312A</sub> -6xHis-tag (R7404)        | This study. oABS29/ oABS30 |
| pSLPH_Y27A | pET28a-SLP <sub>H Y27A</sub> -6xHis-tag (CD630)         | This study. NF1386/ NF1387 |
| pJAK186    | pMTL960 Ptet- <i>s/pASLP</i> <sub>H Y27A</sub> (CD630)  | This study. NF1386/ NF1387 |
| pRPF209    | pMTL960-Ptet- <i>s/pASLP</i> <sub>L F274A</sub> (CD630) | This study. NF1189/ NF1190 |

**Supplementary Table 5. Oligonucleotides used in this study**

| <b>Name</b> | <b>Sequence</b>                  | <b>Application</b>                                                            |
|-------------|----------------------------------|-------------------------------------------------------------------------------|
| oABS1       | GATCCCATGGCAGATAGTAC             | Amplification of SLP <sub>L</sub> R7404 with <i>Nco</i> I site forward primer |
| oABS2       | GATCCTCGAGAGATTTAGTTTC           | Amplification of SLP <sub>L</sub> R7404 with <i>Xho</i> I site reverse primer |
| oABS3       | GCTAAATTTAAAAGATTTAAAAGATTATGTAG | Introduction of N18A point mutation in R7404 SLP <sub>H</sub>                 |
| oABS4       | AGCTTTTATAGTTATTTTAGCTGG         | Introduction of N18A point mutation in R7404 SLP <sub>H</sub>                 |
| oABS5       | GCTGTAGATGATTTAAAACATAC          | Introduction of Y26A point mutation in R7404 SLP <sub>H</sub>                 |
| oABS6       | ATCTTTTAAATCTTTTAATTTATTAGC      | Introduction of Y26A point mutation in R7404 SLP <sub>H</sub>                 |
| oABS7       | GCTGATTTAAAACATACAATAATAC        | Introduction of D28A point mutation in R7404 SLP <sub>H</sub>                 |
| oABS8       | TACATAATCTTTTAAATCTTTTAATTTATTAG | Introduction of D28A point mutation in R7404 SLP <sub>H</sub>                 |
| oABS11      | GCTAATACTTACTCAAATGTTGTAAC       | Introduction of N34A point mutation in R7404 SLP <sub>H</sub>                 |
| oABS12      | GTATGTTTTTAAATCATCTACATAATC      | Introduction of N34A point mutation in R7404 SLP <sub>H</sub>                 |
| oABS15      | GCGCGCACAGTAGCAGGAGAAGATAGAATAG  | Deletion of HID in R7404 SLP <sub>H</sub>                                     |
| oABS16      | CATGGTATATCTCCTTCTTAAAGTTAAAC    | Deletion of HID in SLP <sub>H</sub> (R7404, R20291)                           |
| oABS17      | GCTTCAAGTTCATATATTAGTGC          | Introduction of D254A point mutation in R7404 SLP <sub>L</sub>                |
| oABS18      | CACATCAATAGATTCTTCTTTTGC         | Introduction of D254A point mutation in R7404 SLP <sub>L</sub>                |
| oABS19      | GCTAGTGCTGAAAATTTAGC             | Introduction of I259A point mutation in R7404 SLP <sub>L</sub>                |
| oABS20      | ATATGAACTTGAATCCACATC            | Introduction of I259A point mutation in R7404 SLP <sub>L</sub>                |
| oABS21      | GCTAATCCTAAAGAGGTTTCTG           | Introduction of F270A point mutation in R7404 SLP <sub>L</sub>                |
| oABS22      | TACATATTTTTTAGCTAAATTTTCAGCAC    | Introduction of F270A point mutation in R7404 SLP <sub>L</sub>                |
| oABS23      | GCTAATGCAATAGTTGCATTAC           | Introduction of Y279A point mutation in R7404 SLP <sub>L</sub>                |

|        |                                                   |                                                                                |
|--------|---------------------------------------------------|--------------------------------------------------------------------------------|
| oABS24 | AGCTTCAGAAACCTCTTTAGG                             | Introduction of Y279A point mutation in R7404 SLP <sub>L</sub>                 |
| oABS25 | GCAAAATATCAAGTTATTTTCTATCC                        | Introduction of G300A point mutation in R7404 SLP <sub>L</sub>                 |
| oABS25 | ATTAATAATTGTAATAATCAGATTC                         | Introduction of G300A point mutation in R7404 SLP <sub>L</sub>                 |
| oABS29 | GCATTAGAAACTAAATCTCTCG                            | Introduction of R312A point mutation in R7404 SLP <sub>L</sub>                 |
| oABS30 | TTTTCTTCTGGATAGAAAATAAC                           | Introduction of R312A point mutation in R7404 SLP <sub>L</sub>                 |
| oABS31 | GCGCGCCTCGAGCACCACCACCAC                          | Deletion of LID in SLP <sub>L</sub> (R7404, R20291)                            |
| oABS32 | TTTTATAGTACCTGTTGCAGCCATATC                       | Deletion of LID in R7404 SLP <sub>L</sub>                                      |
| oABS33 | GCTGATCCAGATGAAATTTCTG                            | Introduction of F274A point mutation in CD630 SLP <sub>L</sub>                 |
| oABS34 | TACATATCTTTTAGCTAAATTTTCAGC                       | Introduction of F274A point mutation in CD630 SLP <sub>L</sub>                 |
| oABS44 | GATCCCATGGCTGCAAAGGCTTCAATTGCTG                   | Amplification of SLP <sub>H</sub> R20291 with <i>Nco</i> I site forward primer |
| oABS45 | GATCCTCGAGCATACTTAATAAATCTTTT<br>AATTTATTTATAACTG | Amplification of SLP <sub>H</sub> R20291 with <i>Xho</i> I site reverse primer |
| oABS46 | GATCCCATGGCAGAAGATATGTCGAAAGTTG                   | Amplification of SLP <sub>L</sub> R20291 with 5' <i>Nco</i> I site             |
| oABS47 | GATCCTCGAGACTCTTAGTTGTAACCTTTTTCC                 | Amplification of SLP <sub>L</sub> R20291 with 3' <i>Xho</i> I site             |
| oABS48 | AGTTATTACTGGGCTTCCAGATTGTG                        | Introduction of deletion of LID in R20291 SLP <sub>L</sub>                     |
| oABS35 | GCTAATAAAACAGATTTAAATACTCTTTAC                    | Introduction of F273A point mutation in R20291 SLP <sub>L</sub>                |
| oABS36 | TACATATTTTTTAGCTAAATCTTGTGCTG                     | Introduction of F273A point mutation in R20291 SLP <sub>L</sub>                |
| oABS37 | GCTGTGGATGATTTAAGAACATATAATAATG                   | Introduction of Y27A point mutation in R20291 SLP <sub>H</sub>                 |
| oABS38 | ATCTTTTAAGTCTTTCTTCTTATCTGAC                      | Introduction of Y27A point mutation in R20291 SLP <sub>H</sub>                 |
| oABS39 | GCGCGCGAAGTAGCAGGAGAAGATAG                        | Deletion of HID in R20291 SLP <sub>H</sub>                                     |
| NF1189 | GCAGATCCAGATGAAATTTCTGAAGC                        | Introduction of F274A point mutation in CD630 SLP <sub>L</sub>                 |





## SUPPLEMENTARY REFERENCES

1. Bullough, P. A. & Henderson, R. Phase accuracy in high-resolution electron microscopy of trigonal and orthorhombic purple membrane. *Biophys. J.* **58**, 705 (1990).
2. Valpuesta, J. M., Carrascosa, J. L. & Henderson, R. Analysis of electron microscope images and electron diffraction patterns of thin crystals of  $\phi 29$  connectors in ice. *Journal of Molecular Biology* **240**, 281–287 (1994).
3. Wust, J., Sullivan, N. M., Hardegger, U. & Wilkins, T. D. Investigation of an outbreak of antibiotic-associated colitis by various typing methods. *J. Clin. Microbiol.* **16**, 1096–1101 (1982).
4. Stabler, R. A. *et al.* Comparative genome and phenotypic analysis of *Clostridium difficile* 027 strains provides insight into the evolution of a hypervirulent bacterium. *Genome Biol.* **10**, R102 (2009).
5. Kirk, J. A. *et al.* New class of precision antimicrobials redefines role of *Clostridium difficile* S-layer in virulence and viability. *Sci. Transl. Med.* **9**, eaah6813 (2017).
6. Stubbs, S. L. J., Brazier, J. S., O'Neill, G. L. & Duerden, B. I. PCR targeted to the 16S-23S rRNA gene intergenic spacer region of *Clostridium difficile* and construction of a library consisting of 116 different PCR ribotypes. *J. Clin. Microbiol.* **37**, 461–463 (1999).
7. Fagan, R. P. *et al.* Structural insights into the molecular organization of the S-layer from *Clostridium difficile*. *Mol. Microbiol.* **71**, 1308–1322 (2009).
